# Supplementary material
Source: Springer Nature journal article supplement (https://www.springermedizin.de/resource/supplementary/13075_2004_1619_MOESM3_ESM.pdf/9690192)

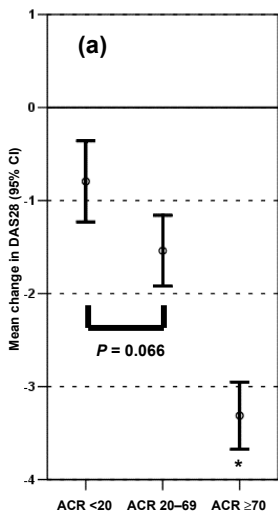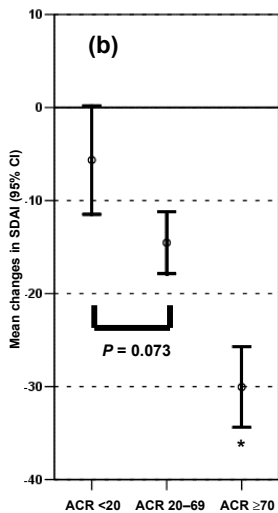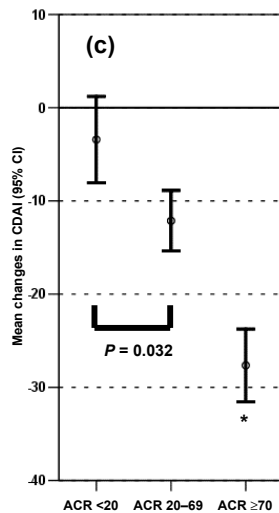

Supplement: MOESM3 [file 9690192]
